# Supplementary material
Source: PubMed Central journal article supplement (PMC1142564)

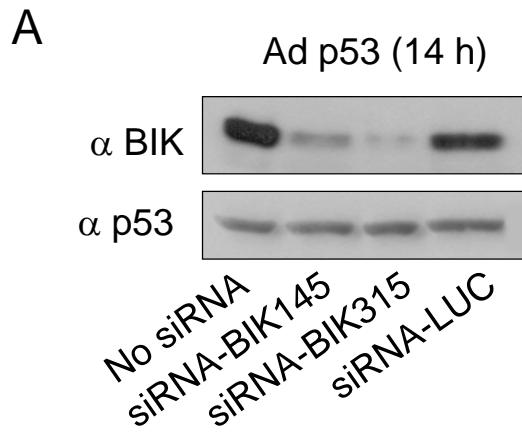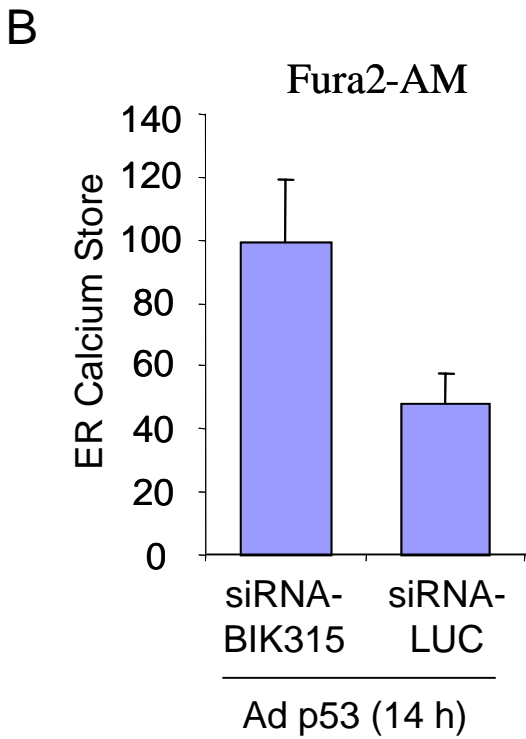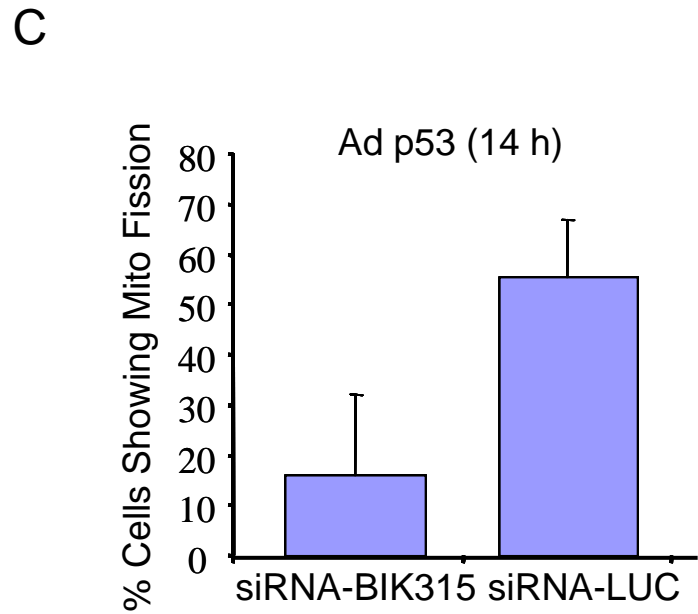

Supplement: 7600592s1.pdf [file 7600592s1.pdf]

$\alpha$  Cyt c

$\alpha$  TOM20

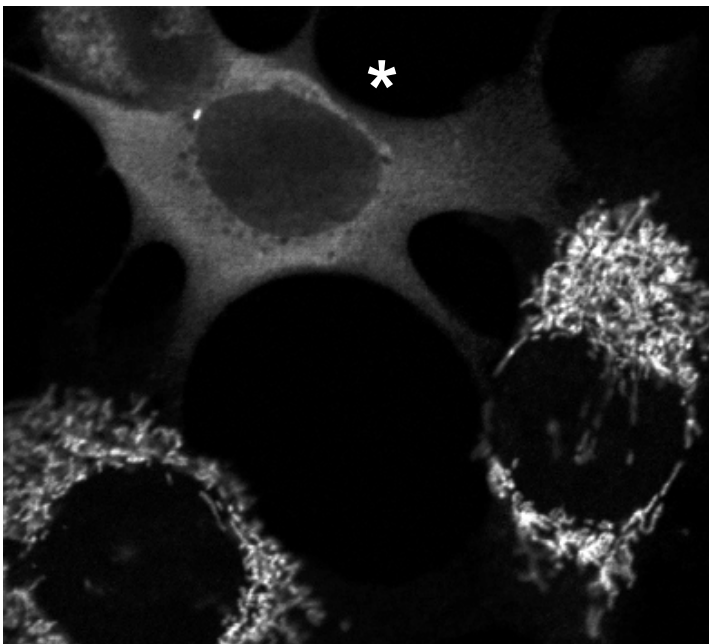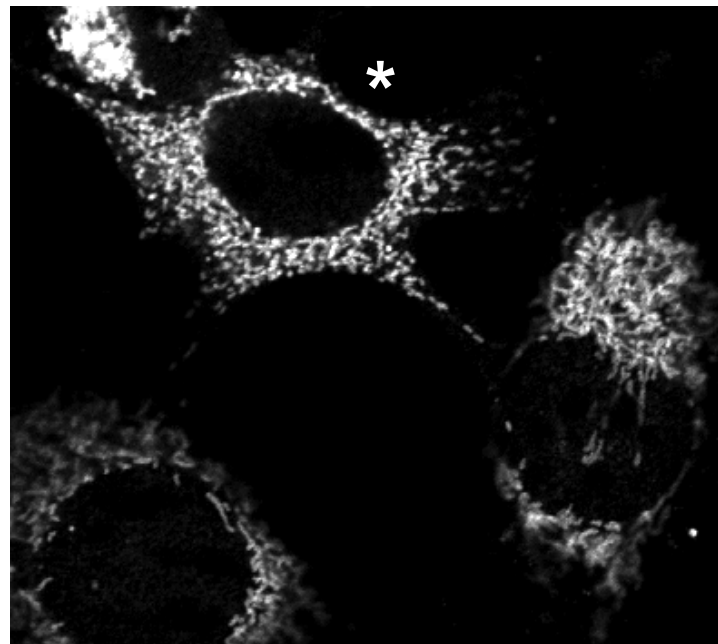

Ad HA-BIK

Supplement: 7600592s2.pdf [file 7600592s2.pdf]

**A**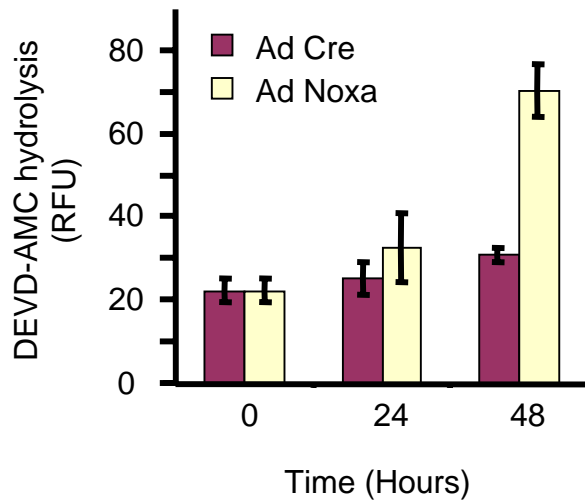**B**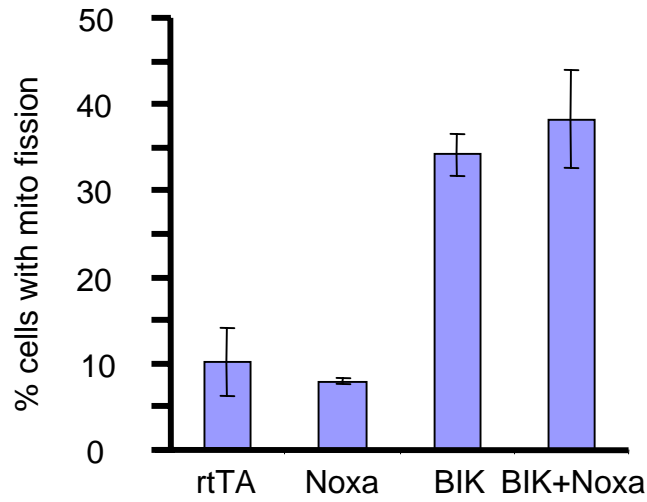**C**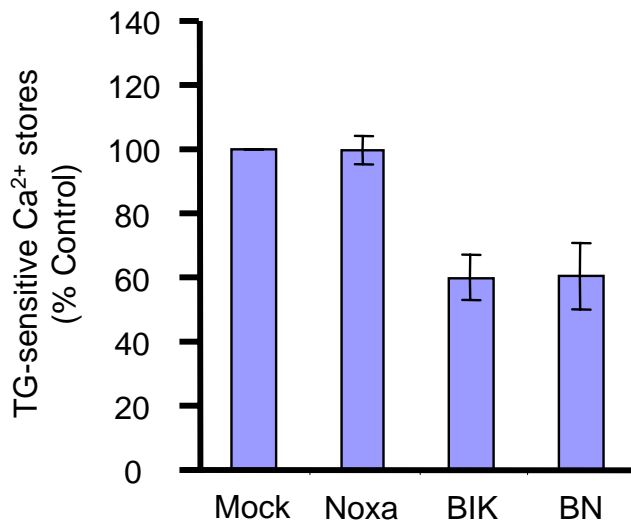

Supplement: 7600592s3.pdf [file 7600592s3.pdf]
